# Supplementary material for: Association between Bone Lead Concentration and Aggression in Youth from a Sub-Cohort of the Birth to Twenty Cohort
Source: MDPI journal article supplement (doi:10.3390/ijerph19042200), 2022-02-15
Supplement: s1 [file s1]

**Table S1.** Assessment of the association between physical aggression, bone lead and individual level confounders: Final model

| Factors                        | Mean | p Value  | 95% CI |       |
|--------------------------------|------|----------|--------|-------|
| Pb                             | 0.1  | 0.352    | -0.099 | 0.274 |
| Age                            |      |          |        |       |
| =23 years                      | ref  |          |        |       |
| =24 years                      | -1.4 | 0.218    | -3.763 | 0.867 |
| Sex                            |      |          |        |       |
| Male                           | ref  |          |        |       |
| Female                         | -1.0 | 0.305    | -2.922 | 0.924 |
| Exposure to family violence    |      |          |        |       |
| Yes                            | 2.7  | 0.012 ** | 0.606  | 4.750 |
| No                             | ref  |          |        |       |
| Exposure to crime and violence |      |          |        |       |
| Yes                            | -1.9 | 0.061*   | -3.834 | 0.086 |
| No                             | ref  |          |        |       |

\*\* $p < 0.05$  significant \* $p \leq 0.08$  marginally significant.

**Table S2.** Assessment of the association between verbal aggression, bone lead and individual level confounders: Final model

| Factors                       | Mean | p Value  | 95% CI |        |
|-------------------------------|------|----------|--------|--------|
| Pb                            | 0.1  | 0.189    | -0.046 | 0.233  |
| Age                           |      |          |        |        |
| =23 years                     | ref  |          |        |        |
| =24 years                     | 0.03 | 0.967    | -1.665 | 1.735  |
| Sex                           |      |          |        |        |
| Male                          | ref  |          |        |        |
| Female                        | 0.9  | 0.244    | -0.588 | 2.290  |
| Exposure to family violence   |      |          |        |        |
| Yes                           | 1.4  | 0.069 *  | -0.116 | 2.987  |
| No                            | ref  |          |        |        |
| Attitude toward neighbourhood |      |          |        |        |
| somewhat unsafe/very unsafe   | -2.8 | 0.003 ** | -4.603 | -0.971 |
| Somewhat safe/very safe       | ref  |          |        |        |

$p < 0.001$  highly significant; \*\* $p < 0.05$  significant; \* $p \leq 0.08$  marginally significant

**Table S3.** Assessment of the association between hostility, bone lead and individual level confounders: Final model

| Factors   | Mean | P value  | 95% CI |        |
|-----------|------|----------|--------|--------|
| Pb        | 0.03 | 0.792    | -0.196 | 0.256  |
| Age       |      |          |        |        |
| =23 years | ref  |          |        |        |
| =24 years | -2.9 | 0.037 ** | -5.675 | -0.183 |
| Sex       |      |          |        |        |
| Male      | ref  |          |        |        |
| Female    | 0.6  | 0.638    | -1.772 | 2.878  |

|                               |      |          |        |        |
|-------------------------------|------|----------|--------|--------|
| Exposure to family violence   |      |          |        |        |
| Yes                           | 2.8  | 0.028 ** | 0.307  | 5.319  |
| No                            | ref  |          |        |        |
| Attitude toward neighbourhood |      |          |        |        |
| somewhat unsafe/very unsafe   | -3.7 | 0.014 ** | -6.646 | -0.778 |
| Somewhat safe/very safe       | ref  |          |        |        |

\*\*  $p < 0.05$  significant.

**Table S4.** Assessment of the association between total aggression score, bone lead and individual level confounders: Final model

| Factors                       | Mean  | <i>p</i> Value | 95% CI  |        |
|-------------------------------|-------|----------------|---------|--------|
| Pb                            | 0.4   | 0.108          | -0.942  | 0.934  |
| Age                           |       |                |         |        |
| =23 years                     | ref   |                |         |        |
| =24 years                     | -5.3  | 0.103          | -11.709 | 1.086  |
| Sex                           |       |                |         |        |
| Male                          | ref   |                |         |        |
| Female                        | 1.3   | 0.624          | -3.999  | 6.627  |
| Exposure to family violence   |       |                |         |        |
| Yes                           | 11.9  | <0.001 ***     | 6.180   | 17.632 |
| No                            | ref   |                |         |        |
| Attitude toward neighbourhood |       |                |         |        |
| somewhat unsafe/very unsafe   | -11.2 | 0.001 **       | -17.979 | -4.481 |
| Somewhat safe/very safe       | ref   |                |         |        |

\*\*\*  $p < 0.001$  highly significant; \*\*  $p < 0.05$ - significant
